# Supplementary material
Source: publisher figshare collection journal article supplement (https://tandf.figshare.com/ndownloader/files/35118688)

## Two new triterpenoid saponins from *Bupleurum marginatum* Wall. ex DC.

Ke Luo<sup>a</sup>, Rong-Ji Dai<sup>a</sup>, Zhi Wang<sup>a,b</sup>, Yan-Bo Zeng<sup>b</sup>, Yu-Lin Deng<sup>a</sup>, Fang Lv<sup>a</sup>

<sup>a</sup>Beijing Key Laboratory for Separation and Analysis in Biomedicine and Pharmaceuticals, School of Life Science, Beijing Institute of Technology, Beijing, China; <sup>b</sup>Hainan Provincial Key Laboratory for Functional Components Research and Utilization of Marine Bio-resources, Institute of Tropical Bioscience and Biotechnology, Chinese Academy of Tropical Agricultural Sciences, Haikou, China

### Abstract

Two new triterpenoid saponins (**1** and **2**), together with two known saponins (**3** and **4**) were isolated from *Bupleurum marginatum* Wall. ex DC.. Their structures were elucidated by the comprehensive spectroscopic analysis. Compounds **1** and **2** represented the rare example of an oleanane-type triterpenoid with two sugar moieties at C-3 and C-28. The cytotoxic activity of four compounds was evaluated against normal hepatocell BRL-3A *in vitro*.

### Keywords

*Bupleurum marginatum* Wall. ex DC.; medicinal plant; triterpenoid saponins; cytotoxicity

---

**CONTACT** Fang Lv [lvfangbeijing@bit.edu.cn](mailto:lvfangbeijing@bit.edu.cn) School of Life Science, Beijing Institute of Technology, Beijing, China

## Contents

**Table S1.**  $^1\text{H}$  NMR Data for compounds 1 and 2

**Table S2.**  $^{13}\text{C}$  NMR Data for compounds 1 and 2

**Figure S1.** The key HMBC (red arrows) and  $^1\text{H}$ - $^1\text{H}$  COSY (blue bold lines) correlations of compound 1

**Figure S2.** The key HMBC (red arrows) and  $^1\text{H}$ - $^1\text{H}$  COSY (blue bold lines) correlations of compound 2

**Figure S3.**  $^1\text{H}$  NMR (700 MHz, Methanol-D<sub>4</sub>) spectrum of compound 1

**Figure S4.**  $^{13}\text{C}$  NMR (176 MHz, Methanol-D<sub>4</sub>) spectrum of compound 1

**Figure S5.** DEPT 135 (176 MHz, Methanol-D<sub>4</sub>) spectrum of compound 1

**Figure S6.** HSQC (700 MHz, Methanol-D<sub>4</sub>) spectrum of compound 1

**Figure S7.** HMBC (700 MHz, Methanol-D<sub>4</sub>) spectrum of compound 1

**Figure S8.**  $^1\text{H}$ - $^1\text{H}$  COSY (700 MHz, Methanol-D<sub>4</sub>) spectrum of compound 1

**Figure S9.** HR-ESI-MS of compound 1

**Figure S10.**  $^1\text{H}$  NMR (700 MHz, Methanol-D<sub>4</sub>) spectrum of compound 2

**Figure S11.**  $^{13}\text{C}$  NMR (176 MHz, Methanol-D<sub>4</sub>) spectrum of compound 2

**Figure S12.** DEPT 135 (176 MHz, Methanol-D<sub>4</sub>) spectrum of compound 2

**Figure S13.** HSQC (700 MHz, Methanol-D<sub>4</sub>) spectrum of compound 2

**Figure S14.** HMBC (700 MHz, Methanol-D<sub>4</sub>) spectrum of compound 2

**Figure S15.**  $^1\text{H}$ - $^1\text{H}$  COSY (700 MHz, Methanol-D<sub>4</sub>) spectrum of compound 2

**Figure S16.** HR-ESI-MS of compound 2

**Figure S17.**  $^1\text{H}$  NMR (700 MHz, Methanol-D<sub>4</sub>) spectrum of compound 3

**Figure S18.**  $^{13}\text{C}$  NMR (176 MHz, Methanol-D<sub>4</sub>) spectrum of compound 3

**Figure S19.** HR-ESI-MS of compound 3

**Figure S20.**  $^1\text{H}$  NMR (700 MHz, Methanol-D<sub>4</sub>) of compound 4

**Figure S21.**  $^{13}\text{C}$  NMR (176 MHz, Methanol-D<sub>4</sub>) spectrum of compound 4

**Figure S22.** HR-ESI-MS of compound 4

**Table S1.** <sup>1</sup>H NMR Data for compounds 1 and 2

| No.       | Comp.1                     | Comp.2                   | No.      | Comp.1                    | Comp.2                    |
|-----------|----------------------------|--------------------------|----------|---------------------------|---------------------------|
| <b>1</b>  | 1.90 m, 1.06 m             | 1.91 m, 1.03 m           |          | <b>Glucose</b>            | <b>Glucose</b>            |
|           |                            |                          |          | <b>(1→C3 of agly)</b>     | <b>(1→C3 of agly)</b>     |
| <b>2</b>  | 1.98 m, 1.76 m             | 1.97 m, 1.87 m           | <b>1</b> | 4.38 d, <i>J</i> = 7.9 Hz | 4.54 d, <i>J</i> = 7.7 Hz |
| <b>3</b>  | 3.22 m                     | 3.44 m                   | <b>2</b> | 3.26 m                    | 3.26 m                    |
| <b>4</b>  |                            |                          | <b>3</b> | 3.47 m                    | 3.57 m                    |
| <b>5</b>  | 0.88 m                     | 3.33 m                   | <b>4</b> | 3.61 m                    | 3.67 m                    |
| <b>6</b>  | 1.65m, 1.48 m              | 1.59 m, 1.45 m           | <b>5</b> | 3.43 m                    | 3.58 m                    |
| <b>7</b>  | 2.48 m, 1.86 m             | 2.55 m, 1.96 m           | <b>6</b> | 4.13 m, 3.79 m            | 3.84 m                    |
| <b>8</b>  |                            |                          |          | <b>Rhamnose</b>           | <b>Rhamnose</b>           |
|           |                            |                          |          | <b>(1→C4 of Glc)</b>      | <b>(1→C3 of Glc)</b>      |
| <b>9</b>  | 2.01 m                     | 2.07 m                   | <b>1</b> | 4.92 d, <i>J</i> = 7.7 Hz | 4.60 d, <i>J</i> = 7.7 Hz |
| <b>10</b> |                            |                          | <b>2</b> | 3.89 m                    | 3.87 m                    |
| <b>11</b> | 5.62 d, <i>J</i> = 10.5 Hz | 5.61 d, <i>J</i> = 11 Hz | <b>3</b> | 3.65 m                    | 3.30 m                    |
| <b>12</b> | 6.45 d, <i>J</i> = 10.5 Hz | 6.50 d, <i>J</i> = 11 Hz | <b>4</b> | 3.25 m                    | 3.56                      |
| <b>13</b> |                            |                          | <b>5</b> | 3.96 m                    | 3.40 m                    |
| <b>14</b> |                            |                          | <b>6</b> | 1.29 d, <i>J</i> = 6.2 Hz | 1.29 d, <i>J</i> = 6.4 Hz |
| <b>15</b> | 1.98 m, 1.44 m             | 1.95 m, 1.45 m           |          | <b>Glucose'</b>           | <b>Xylose</b>             |
|           |                            |                          |          | <b>(1→C6 of Glc)</b>      | <b>(1→C4 of Glc)</b>      |
| <b>16</b> | 4.21 m                     | 4.06 m                   | <b>1</b> | 4.34 d, <i>J</i> = 7.8 Hz | 4.45 d, <i>J</i> = 7.8 Hz |
| <b>17</b> |                            |                          | <b>2</b> | 3.26 m                    | 3.69 m                    |
| <b>18</b> |                            |                          | <b>3</b> | 3.37 m                    | 3.30 m                    |
| <b>19</b> | 1.42 m                     | 1.51 m, 1.38 m           | <b>4</b> | 3.29 m                    | 3.50 m                    |
| <b>20</b> |                            |                          | <b>5</b> | 3.53 m                    | 3.90 m                    |
| <b>21</b> | 1.99 m, 1.77 m             | 1.77 m, 1.33 m           | <b>6</b> | 3.70 m                    |                           |
| <b>22</b> | 1.76 m, 1.20 m             | 2.04 m, 1.66 m           |          | <b>Glucose''</b>          | <b>Glucose'</b>           |
|           |                            |                          |          | <b>(1→C28)</b>            | <b>(1→C28)</b>            |
| <b>23</b> | 1.08 s                     | 3.70 m                   | <b>1</b> | 4.20 d, <i>J</i> = 7.8 Hz | 4.27 d, <i>J</i> = 7.8 Hz |
| <b>24</b> | 0.87 s                     | 0.72 s                   | <b>2</b> | 3.20 m                    | 3.24 m                    |
| <b>25</b> | 0.94 s                     | 0.97 s                   | <b>3</b> | 3.36 m                    | 3.37 m                    |
| <b>26</b> | 0.76 s                     | 0.75 s                   | <b>4</b> | 3.28 m                    | 3.26 m                    |
| <b>27</b> | 1.26 s                     | 1.27 s                   | <b>5</b> | 3.33 m                    | 3.30 m                    |
| <b>28</b> | 4.17 m, 3.23 m             | 3.72 m, 3.25 m           | <b>6</b> | 3.89 m                    | 3.89 m                    |
| <b>29</b> | 0.85 s                     | 0.92 s                   |          |                           |                           |
| <b>30</b> | 3.30 m, 3.28 m             | 3.99 m, 3.29 m           |          |                           |                           |

**Table S2.**  $^{13}\text{C}$  NMR Data for compounds 1 and 2

| No.       | Comp.1 | Comp.2 | No.      | Comp.1                | Comp.2                |
|-----------|--------|--------|----------|-----------------------|-----------------------|
| <b>1</b>  | 38.0   | 37.7   |          | <b>Glucose</b>        | <b>Glucose</b>        |
|           |        |        |          | <b>(1→C3 of agly)</b> | <b>(1→C3 of agly)</b> |
| <b>2</b>  | 25.6   | 24.5   | <b>1</b> | 105.2                 | 106.2                 |
| <b>3</b>  | 89.5   | 84.4   | <b>2</b> | 76.6                  | 74.6                  |
| <b>4</b>  | 41.0   | 42.6   | <b>3</b> | 75.6                  | 85.7                  |
| <b>5</b>  | 55.2   | 46.9   | <b>4</b> | 78.9                  | 81.9                  |
| <b>6</b>  | 18.0   | 17.6   | <b>5</b> | 72.3                  | 76.2                  |
| <b>7</b>  | 32.4   | 32.7   | <b>6</b> | 68.0                  | 60.7                  |
| <b>8</b>  | 40.6   | 41.1   |          | <b>Rhamnose</b>       | <b>Rhamnose</b>       |
|           |        |        |          | <b>(1→C4 of Glc)</b>  | <b>(1→C3 of Glc)</b>  |
| <b>9</b>  | 53.5   | 53.5   | <b>1</b> | 101.6                 | 103.3                 |
| <b>10</b> | 38.9   | 36.4   | <b>2</b> | 71.0                  | 69.3                  |
| <b>11</b> | 126.0  | 125.5  | <b>3</b> | 70.7                  | 70.2                  |
| <b>12</b> | 125.3  | 125.4  | <b>4</b> | 73.5                  | 76.0                  |
| <b>13</b> | 136.5  | 136.2  | <b>5</b> | 69.3                  | 70.7                  |
| <b>14</b> | 36.1   | 36.0   | <b>6</b> | 16.5                  | 15.5                  |
| <b>15</b> | 30.6   | 30.6   |          | <b>Glucose'</b>       | <b>Xylose</b>         |
|           |        |        |          | <b>(1→C6 of Glc)</b>  | <b>(1→C4 of Glc)</b>  |
| <b>16</b> | 67.7   | 67.8   | <b>1</b> | 103.5                 | 103.6                 |
| <b>17</b> | 43.5   | 44.3   | <b>2</b> | 74.3                  | 70.3                  |
| <b>18</b> | 130.2  | 130.7  | <b>3</b> | 76.8                  | 70.2                  |
| <b>19</b> | 32.0   | 31.5   | <b>4</b> | 76.7                  | 69.3                  |
| <b>20</b> | 37.0   | 40.5   | <b>5</b> | 73.8                  | 63.8                  |
| <b>21</b> | 28.6   | 29.1   | <b>6</b> | 61.5                  |                       |
| <b>22</b> | 23.2   | 22.5   |          | <b>Glucose''</b>      | <b>Glucose'</b>       |
|           |        |        |          | <b>(1→C28)</b>        | <b>(1→C28)</b>        |
| <b>23</b> | 26.8   | 63.8   | <b>1</b> | 103.4                 | 103.4                 |
| <b>24</b> | 15.1   | 11.4   | <b>2</b> | 73.9                  | 73.9                  |
| <b>25</b> | 17.3   | 17.7   | <b>3</b> | 76.7                  | 76.8                  |
| <b>26</b> | 16.2   | 16.2   | <b>4</b> | 70.3                  | 74.6                  |
| <b>27</b> | 20.7   | 20.7   | <b>5</b> | 70.1                  | 76.6                  |
| <b>28</b> | 71.6   | 80.3   | <b>6</b> | 61.2                  | 61.4                  |
| <b>29</b> | 19.4   | 19.7   |          |                       |                       |
| <b>30</b> | 72.2   | 65.6   |          |                       |                       |

**Figure S1.** The key HMBC (red arrows) and  $^1\text{H}$ - $^1\text{H}$  COSY (blue bold lines) correlations of compound 1

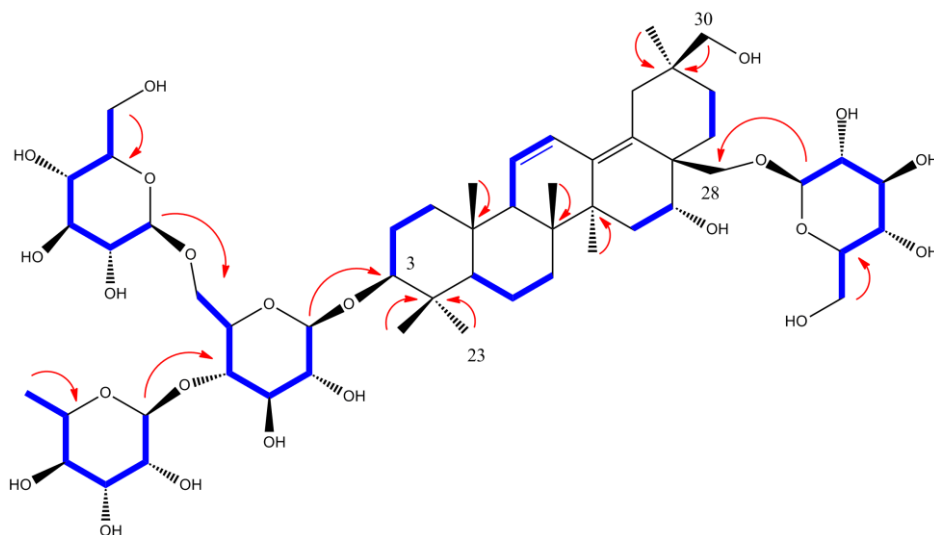

**Figure S2.** The key HMBC (red arrows) and  $^1\text{H}$ - $^1\text{H}$  COSY (blue bold lines) correlations of compound 2

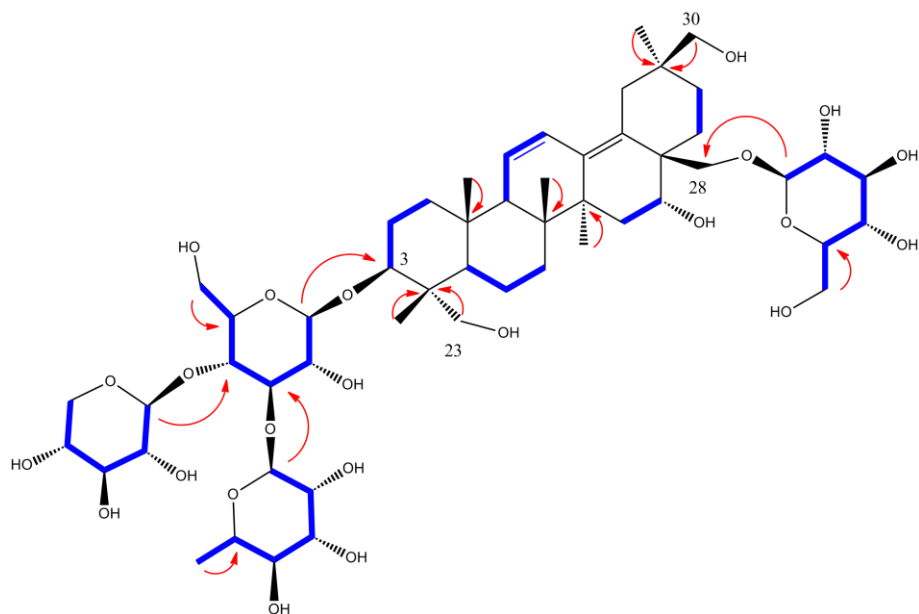

**Figure S3.**  $^1\text{H}$  NMR (700 MHz, Methanol- $\text{D}_4$ ) spectrum of compound 1

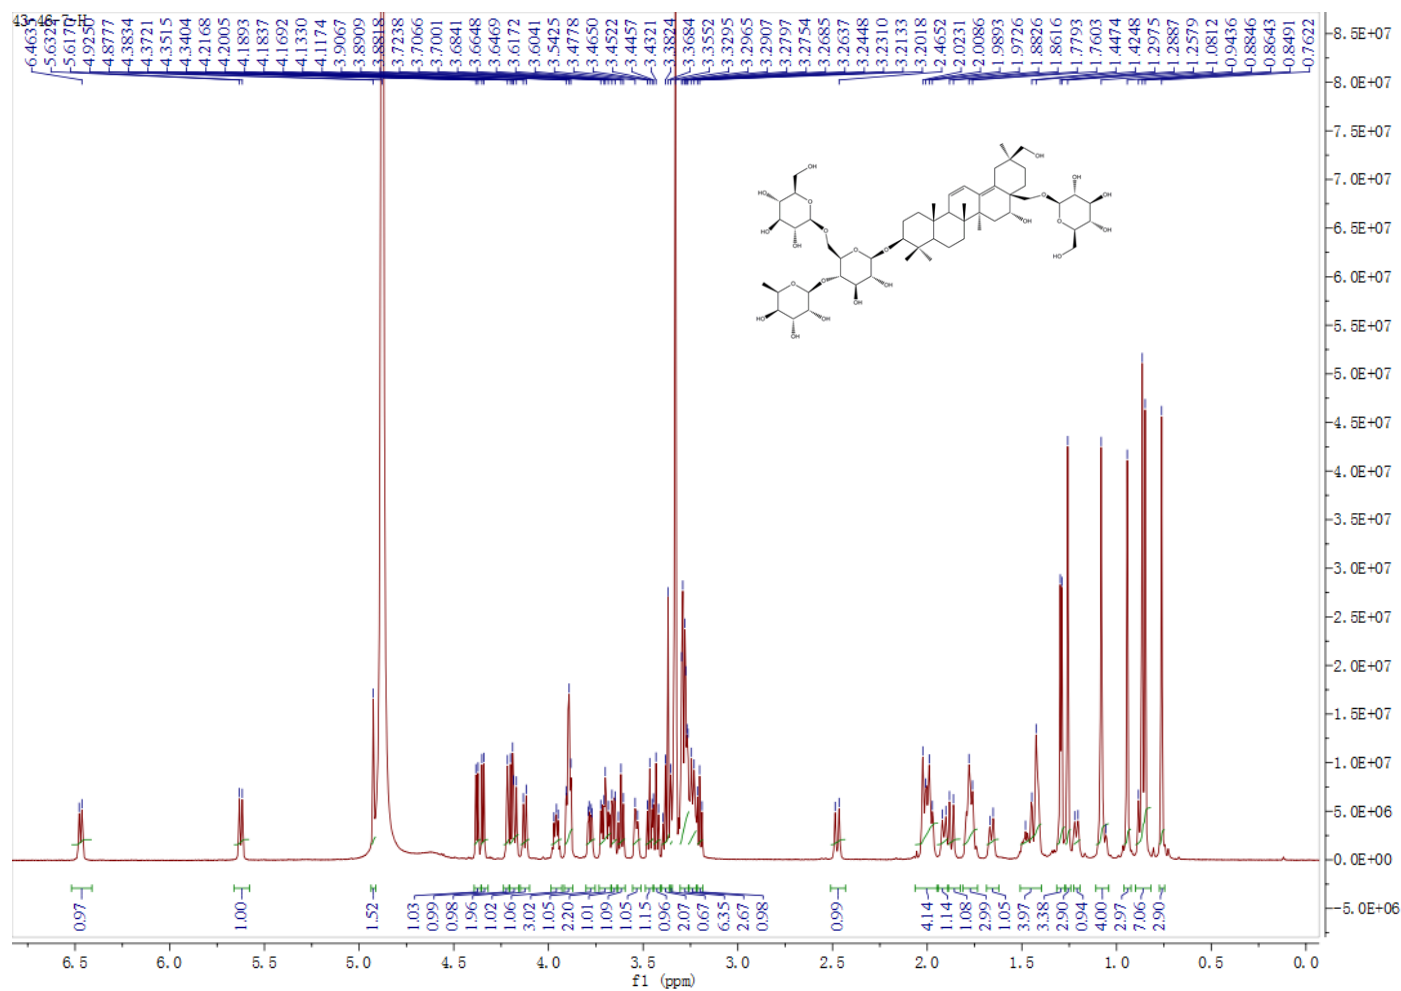

**Figure S4.**  $^{13}\text{C}$  NMR (176 MHz, Methanol- $\text{D}_4$ ) spectrum of compound 1

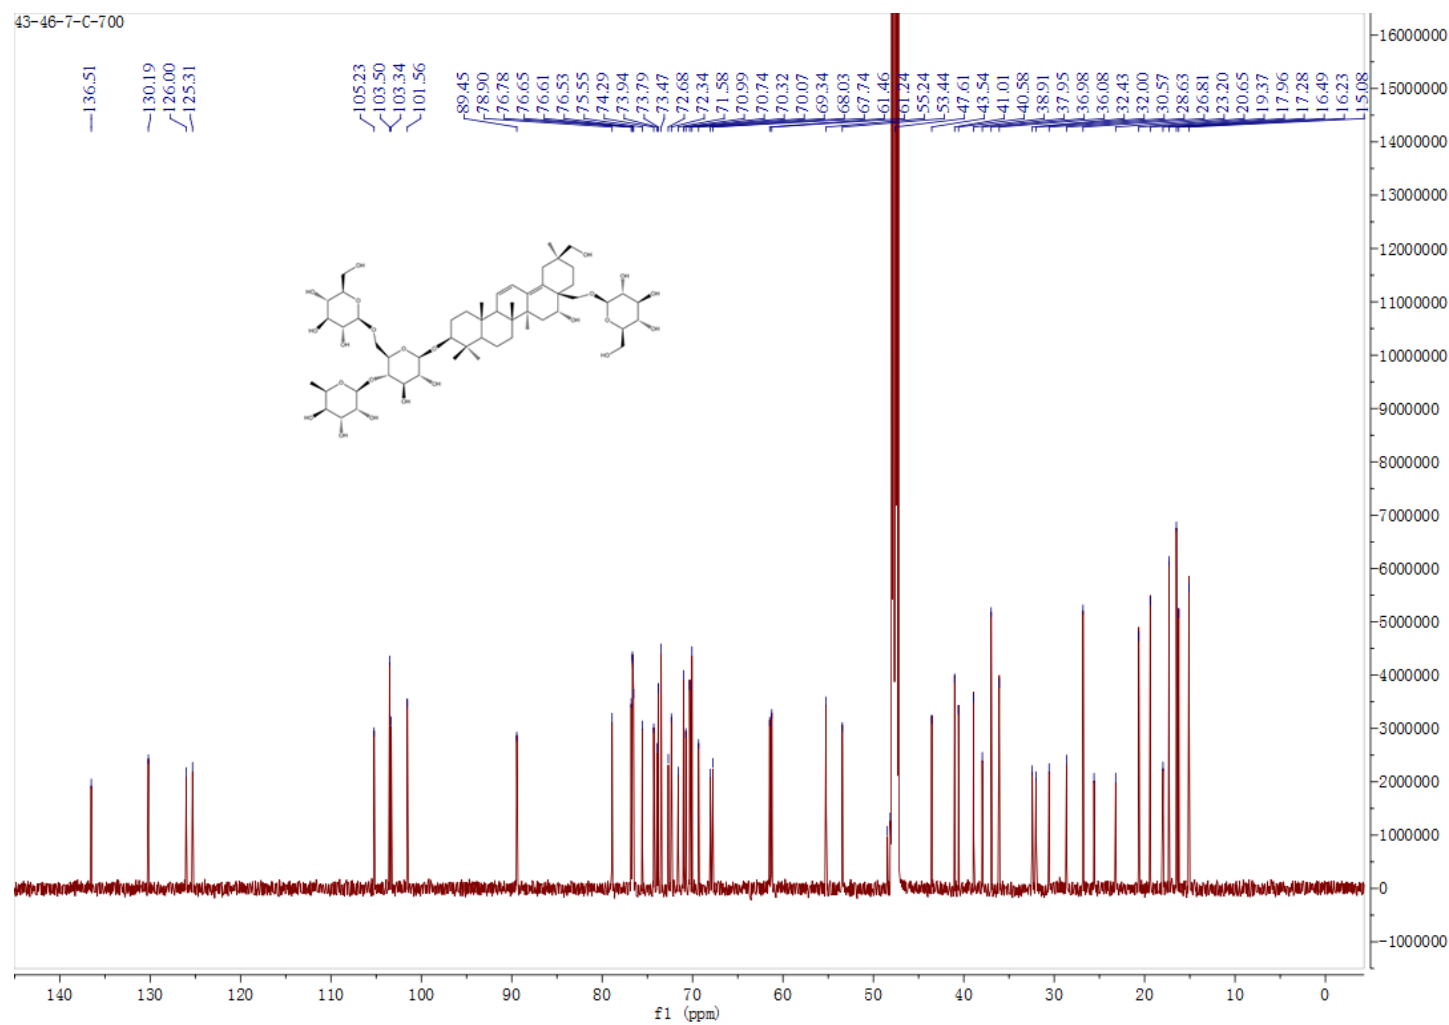



**Figure S5.** DEPT 135 (176 MHz, Methanol-D<sub>4</sub>) spectrum of compound 1

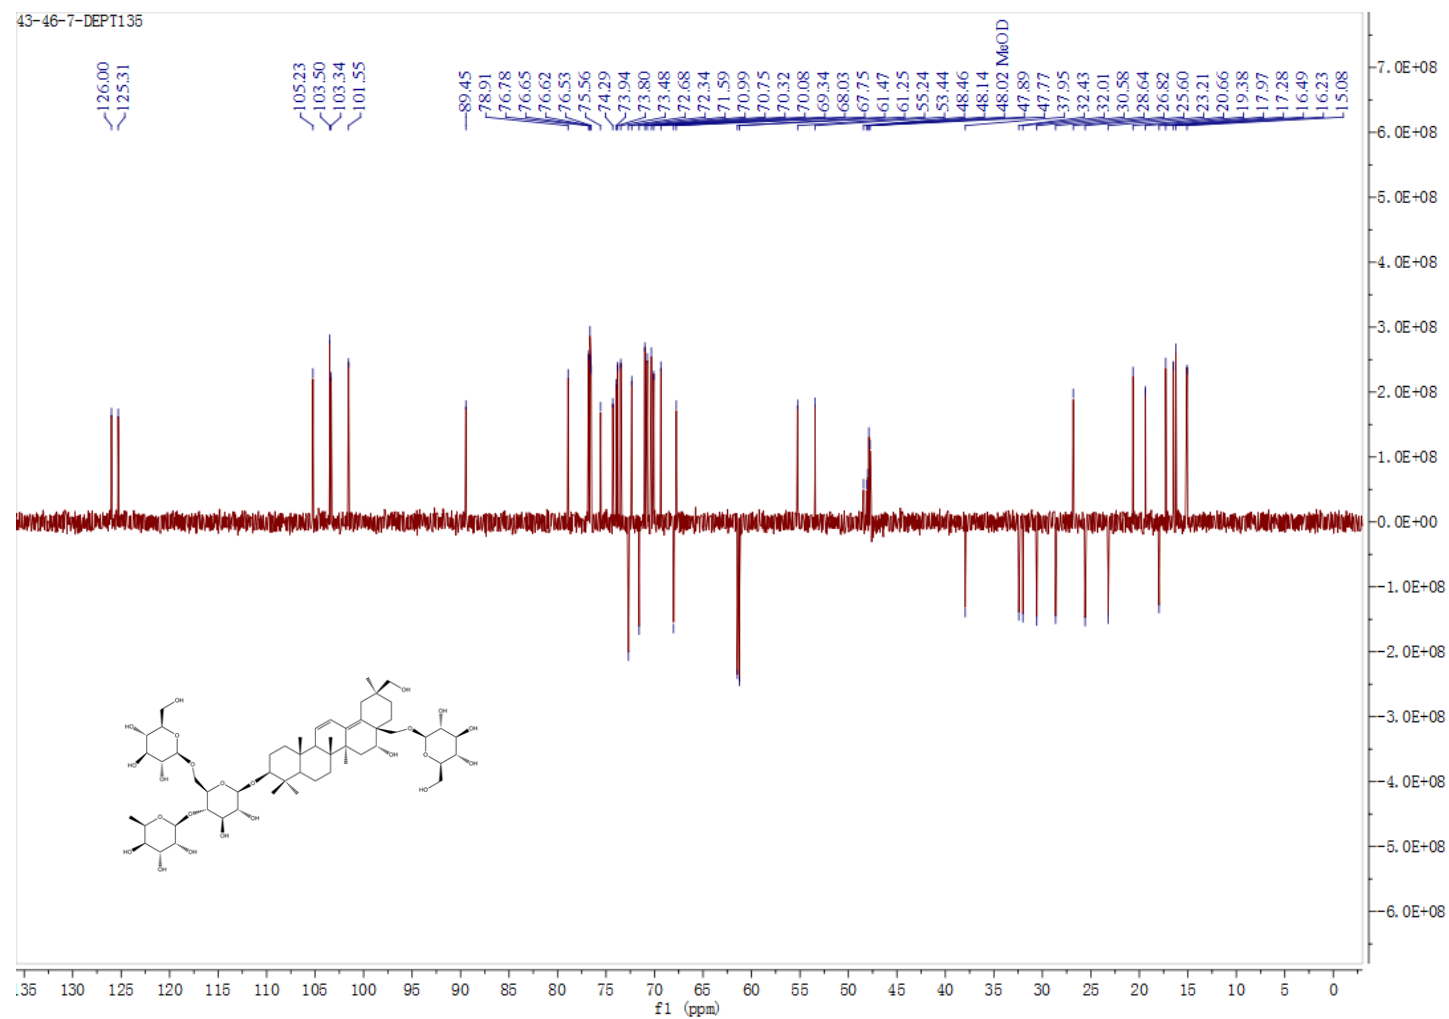

**Figure S6.** HSQC (700 MHz, Methanol-D4) spectrum of compound 1

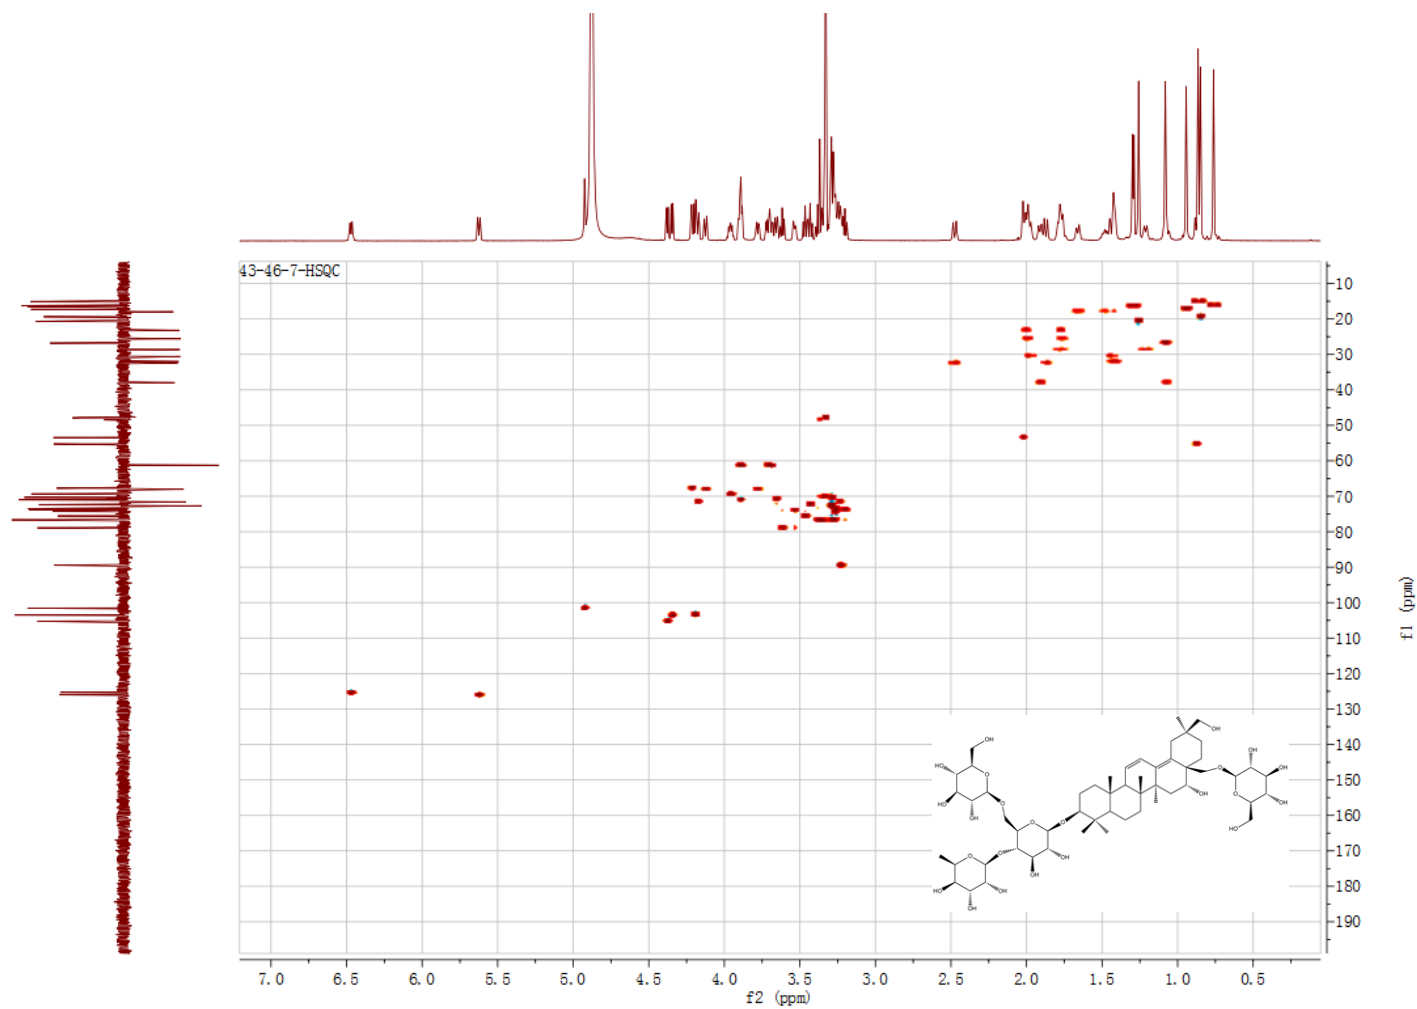

**Figure S7.** HMBC (700 MHz, Methanol-D<sub>4</sub>) spectrum of compound 1

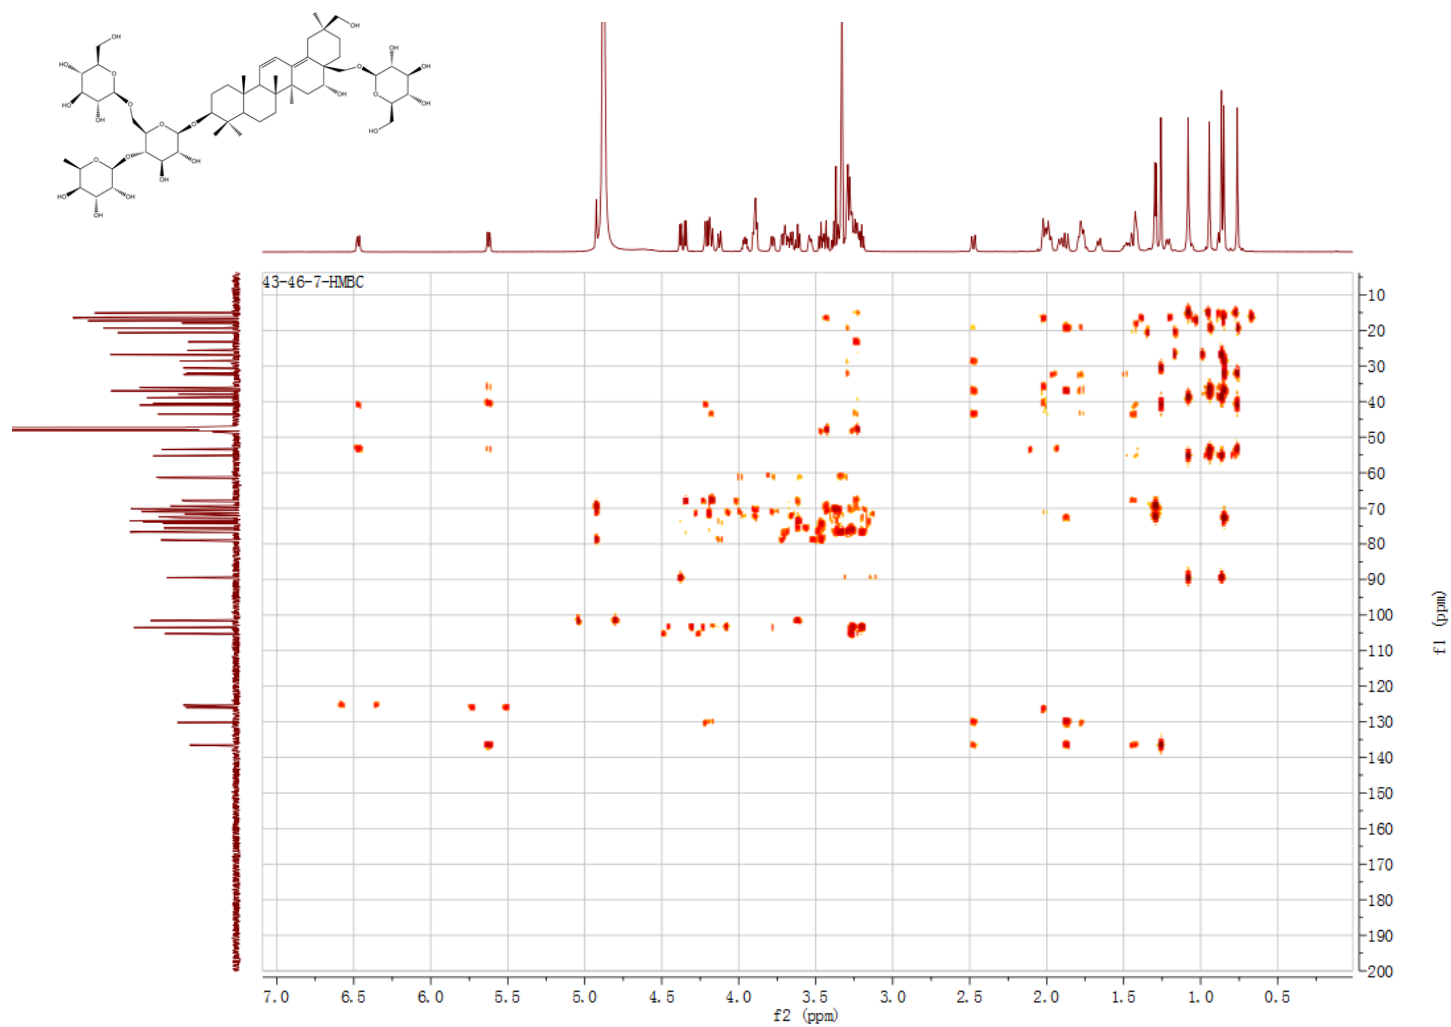

**Figure S8.**  $^1\text{H}$ - $^1\text{H}$  COSY (700 MHz, Methanol- $\text{D}_4$ ) spectrum of compound 1

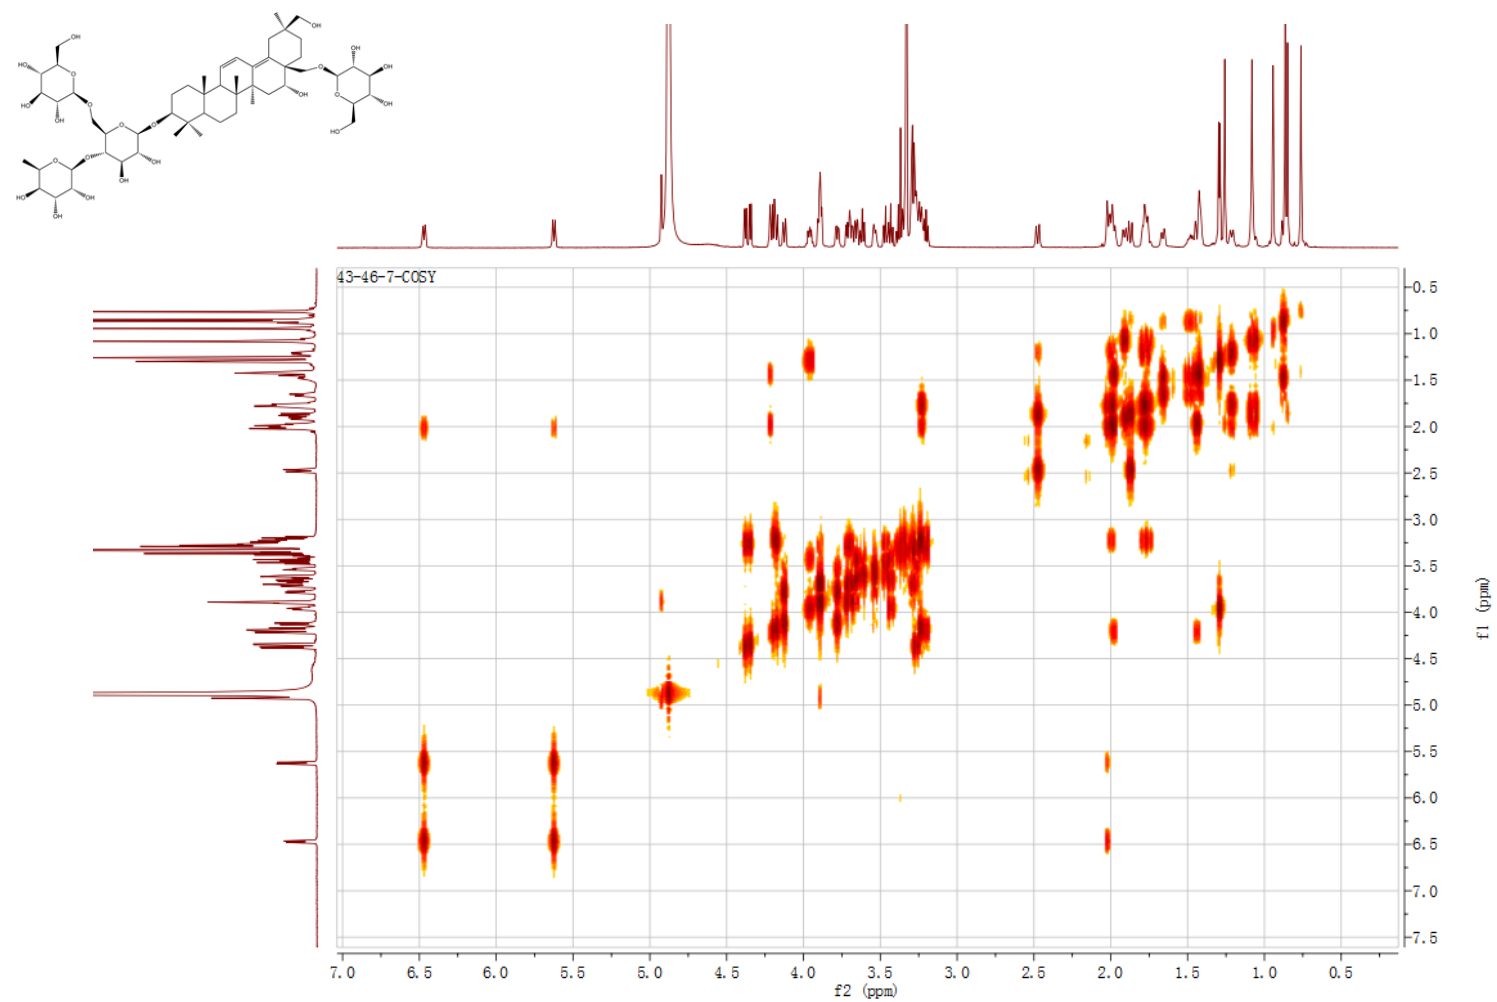

**Figure S9.** HR-ESI-MS of compound 1

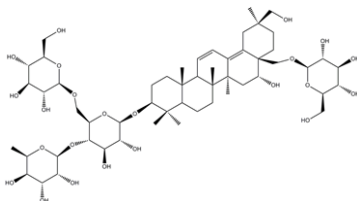

## Mass Spectrum SmartFormula Report

### Analysis Info

Analysis Name D:\Data\A501\WYL\2021\20211122\B502-43-46-7\_GE1\_01\_3475.d Acquisition Date 2021-11-24 16:04:58  
 Method lc-ms\_as\_ms-0.5min-mid.m Operator Demo User  
 Sample Name B502-43-46-7 Instrument compact 8255754.20156  
 Comment

### Acquisition Parameter

|             |            |                      |          |                  |           |
|-------------|------------|----------------------|----------|------------------|-----------|
| Source Type | ESI        | Ion Polarity         | Positive | Set Nebulizer    | 0.3 Bar   |
| Focus       | Not active | Set Capillary        | 3500 V   | Set Dry Heater   | 200 °C    |
| Scan Begin  | 50 m/z     | Set End Plate Offset | -500 V   | Set Dry Gas      | 3.0 l/min |
| Scan End    | 3000 m/z   | Set Charging Voltage | 2000 V   | Set Divert Valve | Source    |
|             |            | Set Corona           | 0 nA     | Set APCI Heater  | 0 °C      |

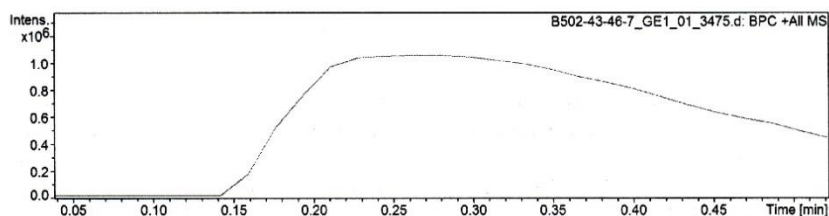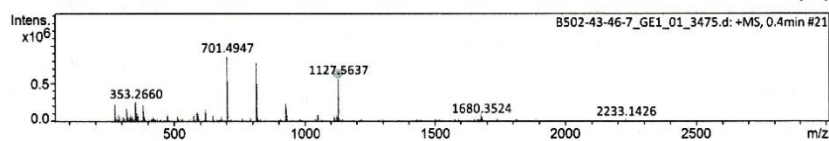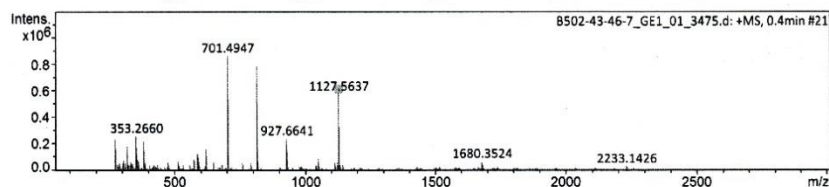

| Meas. m/z | # | Ion Formula                                       | m/z       | err [ppm] | mSigma | # mSigma | Score  | rdB  | e <sup>-</sup> Conf | N-Rule | Adduct |
|-----------|---|---------------------------------------------------|-----------|-----------|--------|----------|--------|------|---------------------|--------|--------|
| 1127.5637 | 1 | C <sub>54</sub> H <sub>88</sub> NaO <sub>23</sub> | 1127.5609 | -2.5      | 30.7   | 1        | 100.00 | 11.0 | even                | ok     | M+Na   |

**Figure S10.**  $^1\text{H}$  NMR (700 MHz, Methanol- $\text{D}_4$ ) spectrum of compound 2

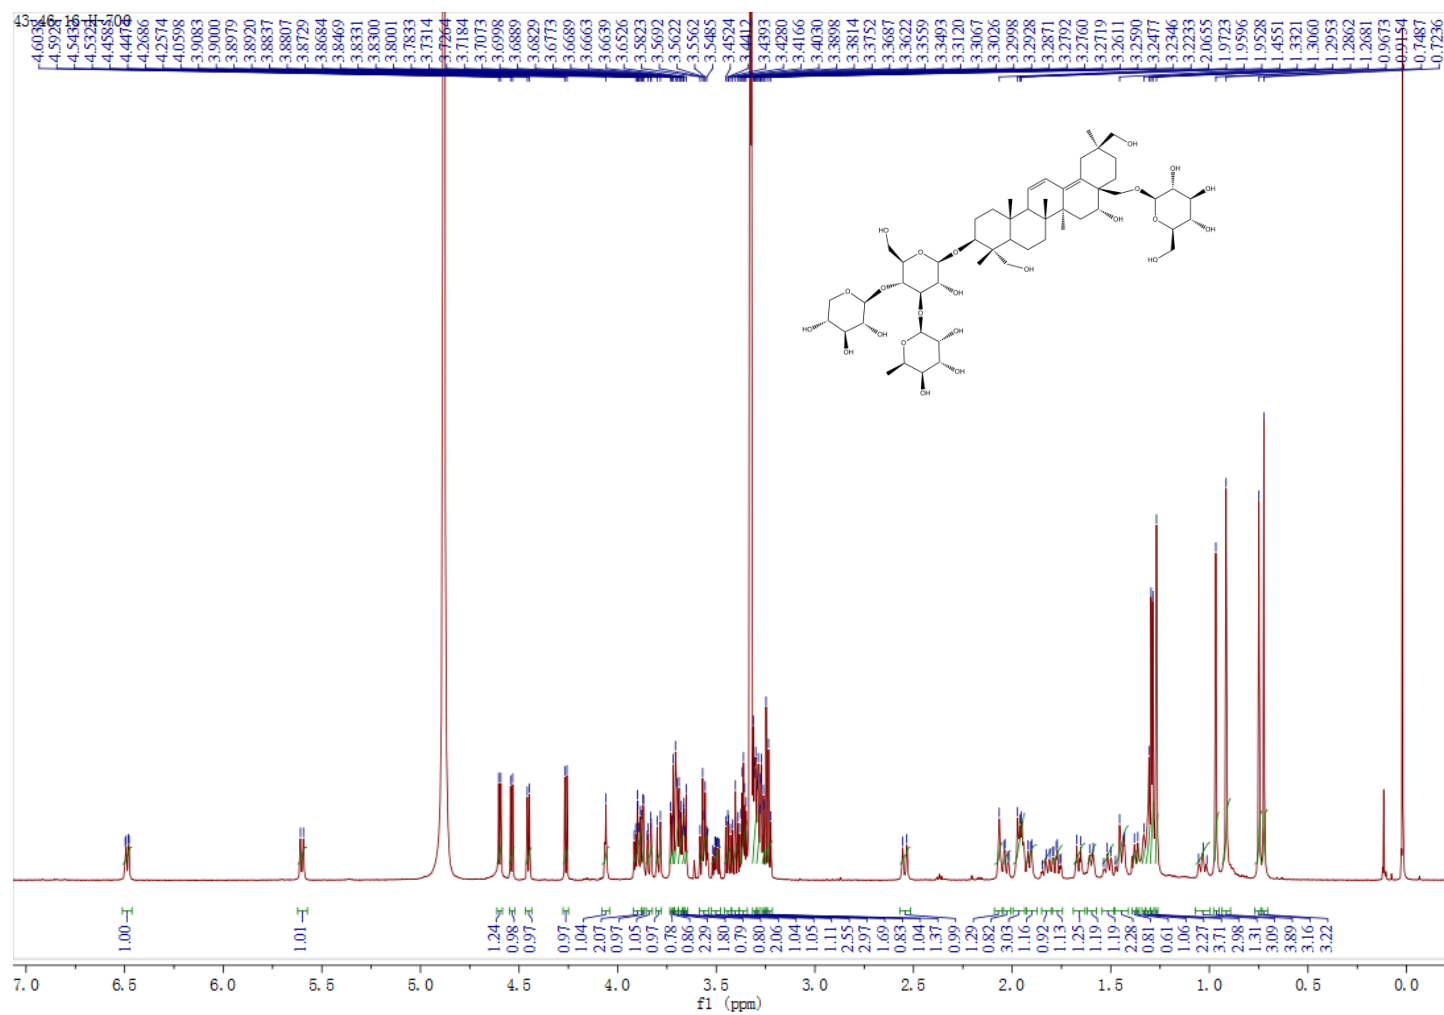

**Figure S11.**  $^{13}\text{C}$  NMR (176 MHz, Methanol- $\text{D}_4$ ) spectrum of compound 2

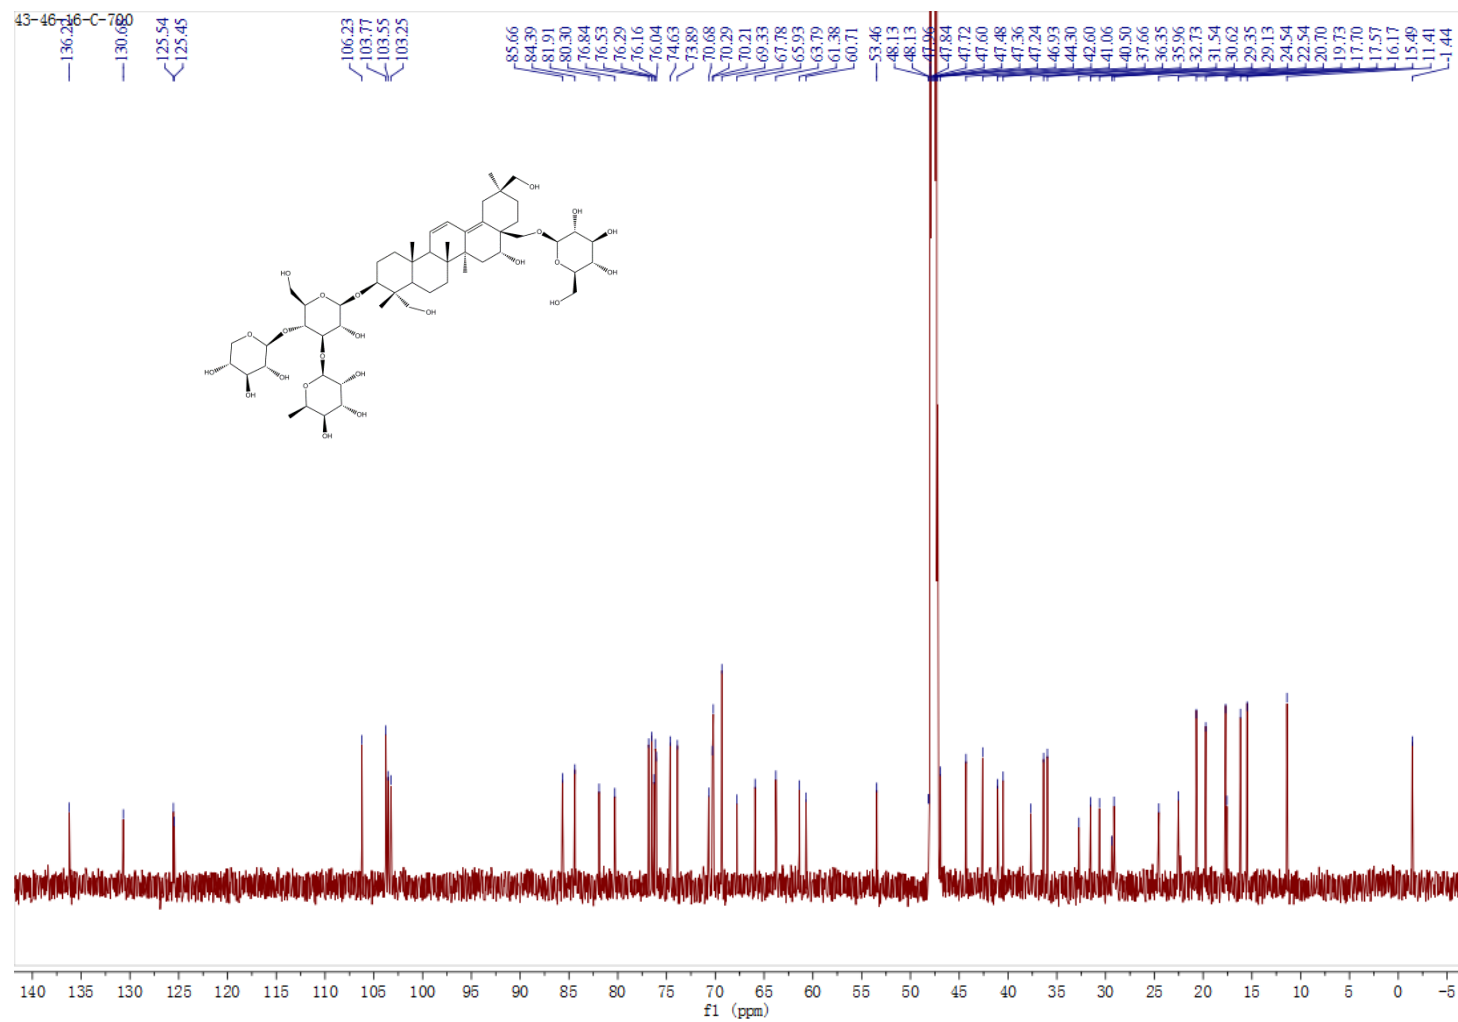

**Figure S12.** DEPT 135 (176 MHz, Methanol-D<sub>4</sub>) spectrum of compound 2

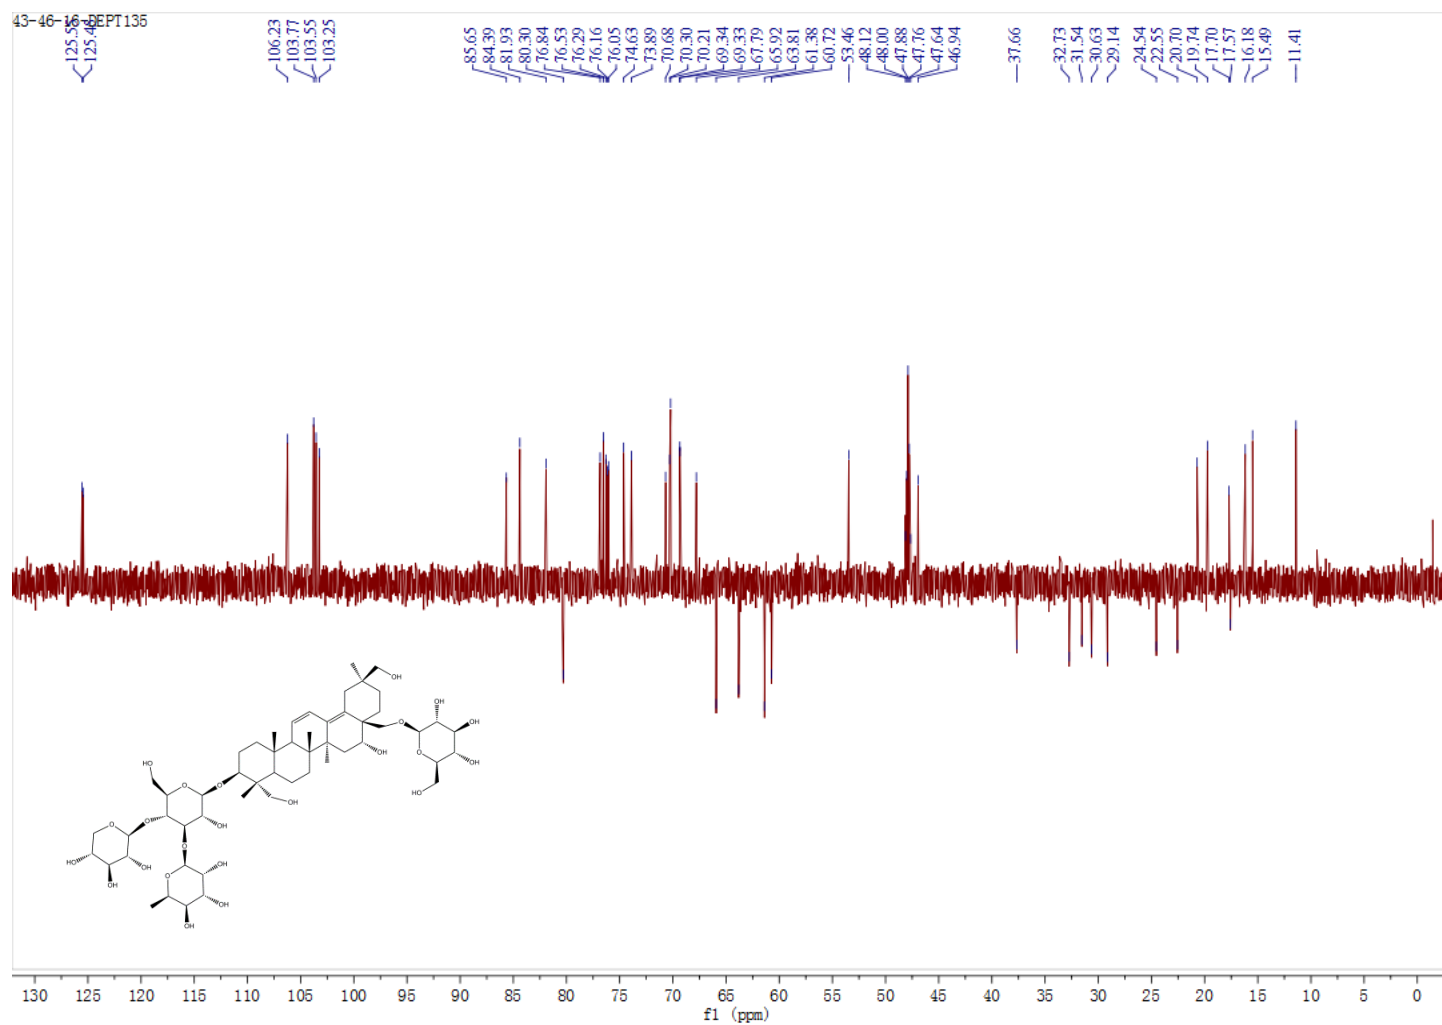



**Figure S13.** HSQC (700 MHz, Methanol-D<sub>4</sub>) spectrum of compound 2

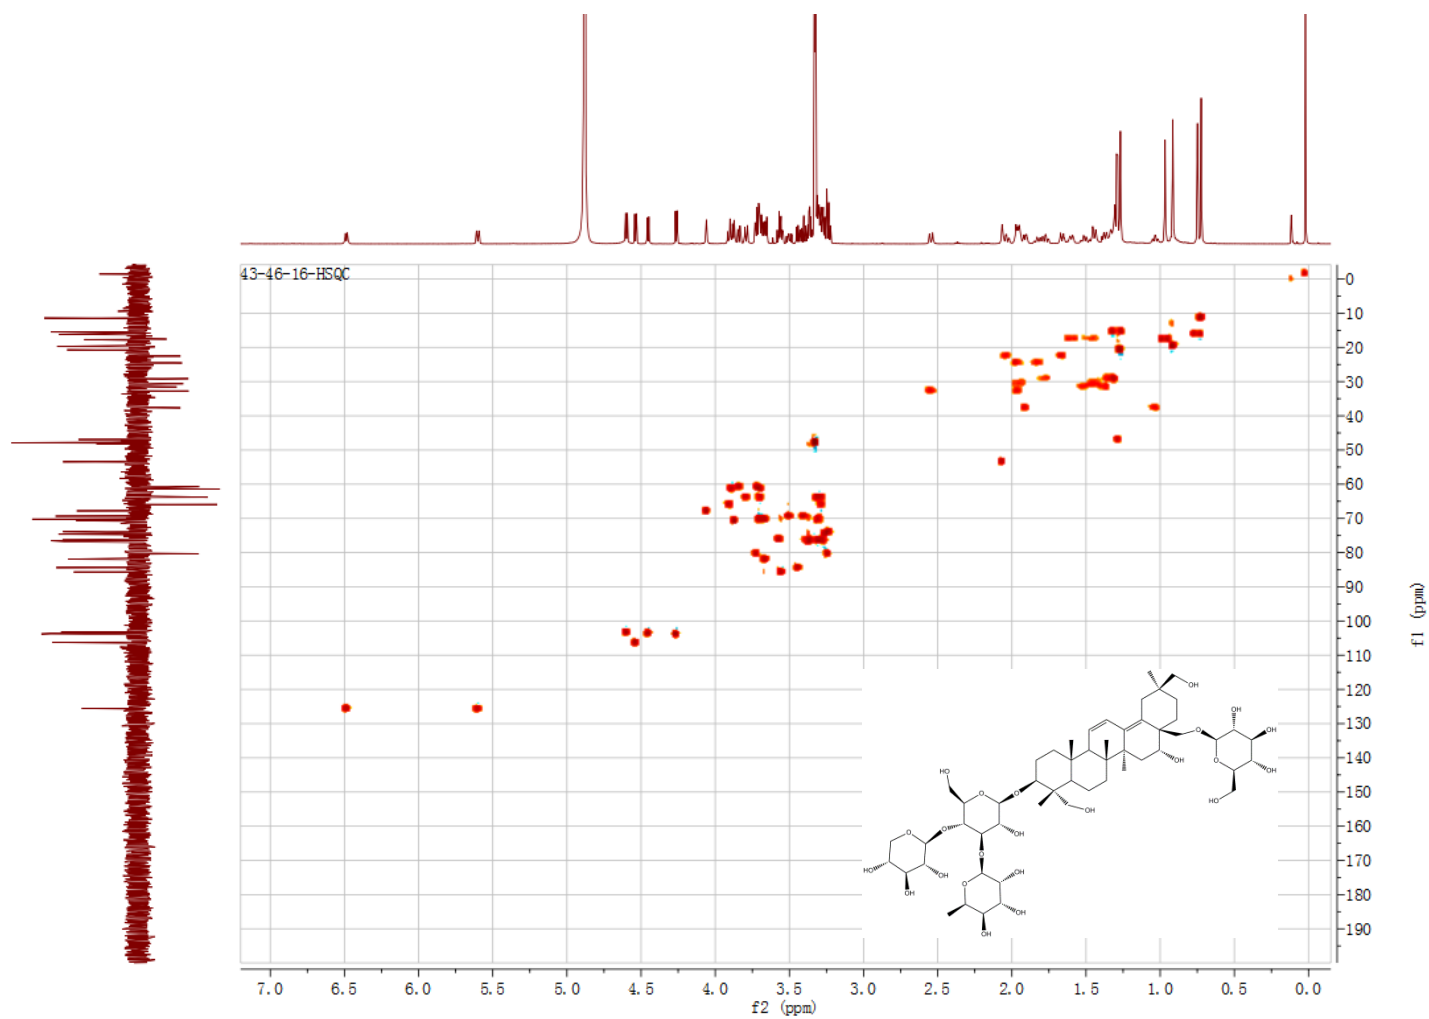

**Figure S14.** HMBC (700 MHz, Methanol-D<sub>4</sub>) spectrum of compound 2

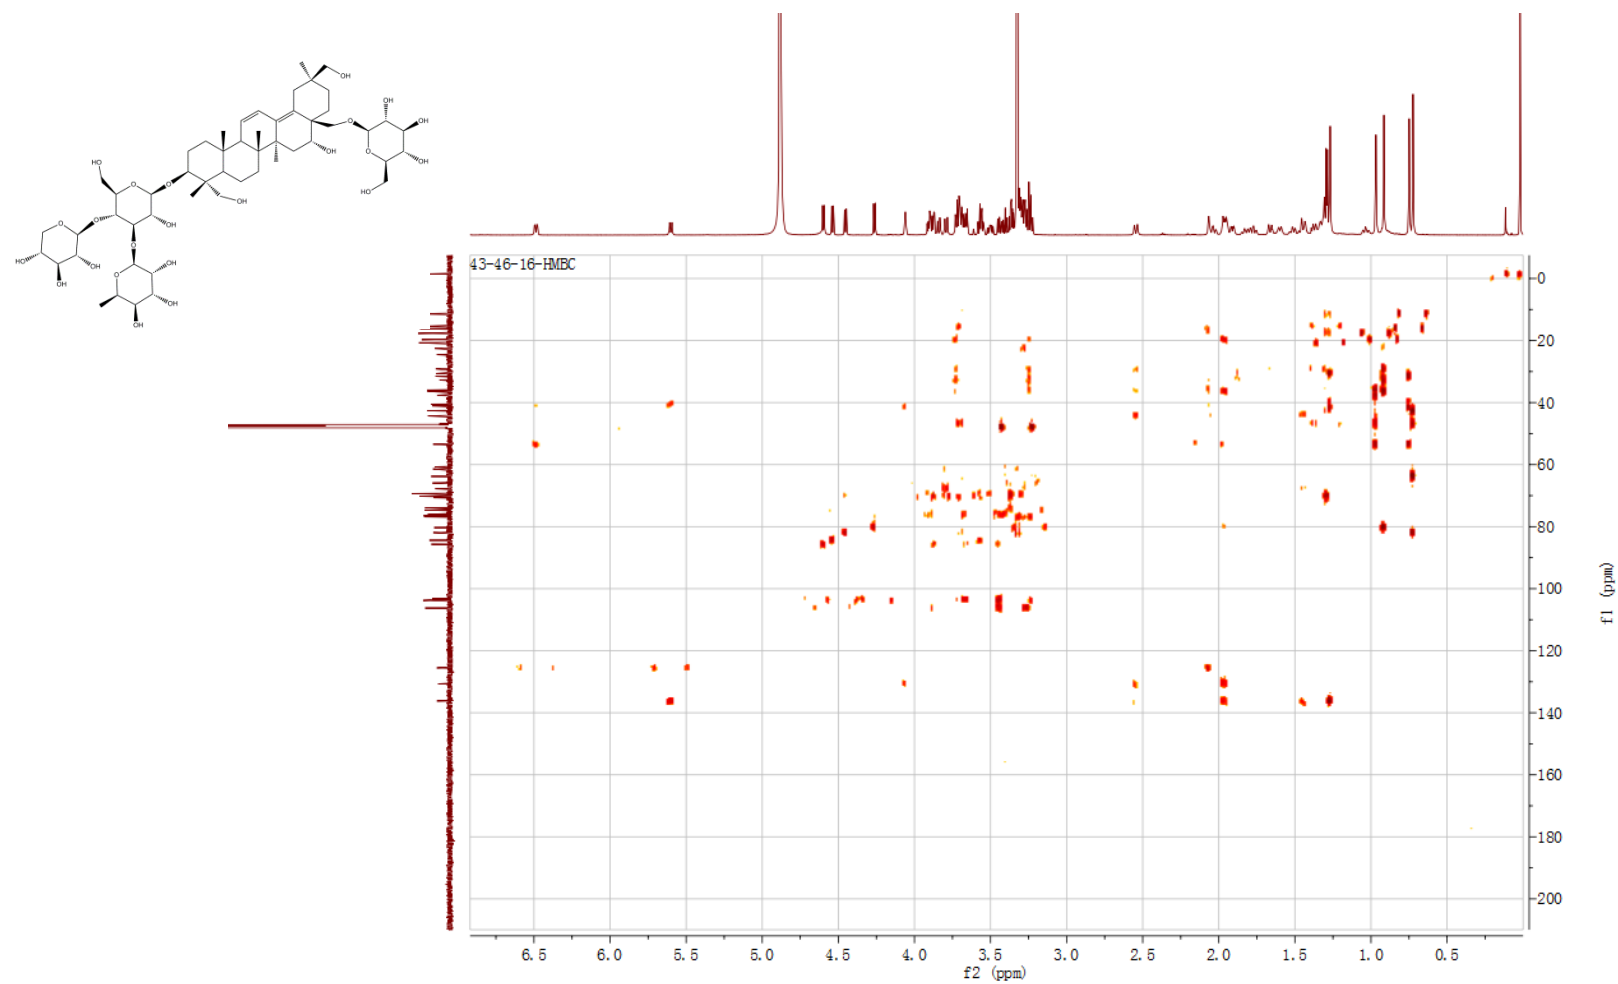

**Figure S15.**  $^1\text{H}$ - $^1\text{H}$  COSY (700 MHz, Methanol- $\text{D}_4$ ) spectrum of compound 2

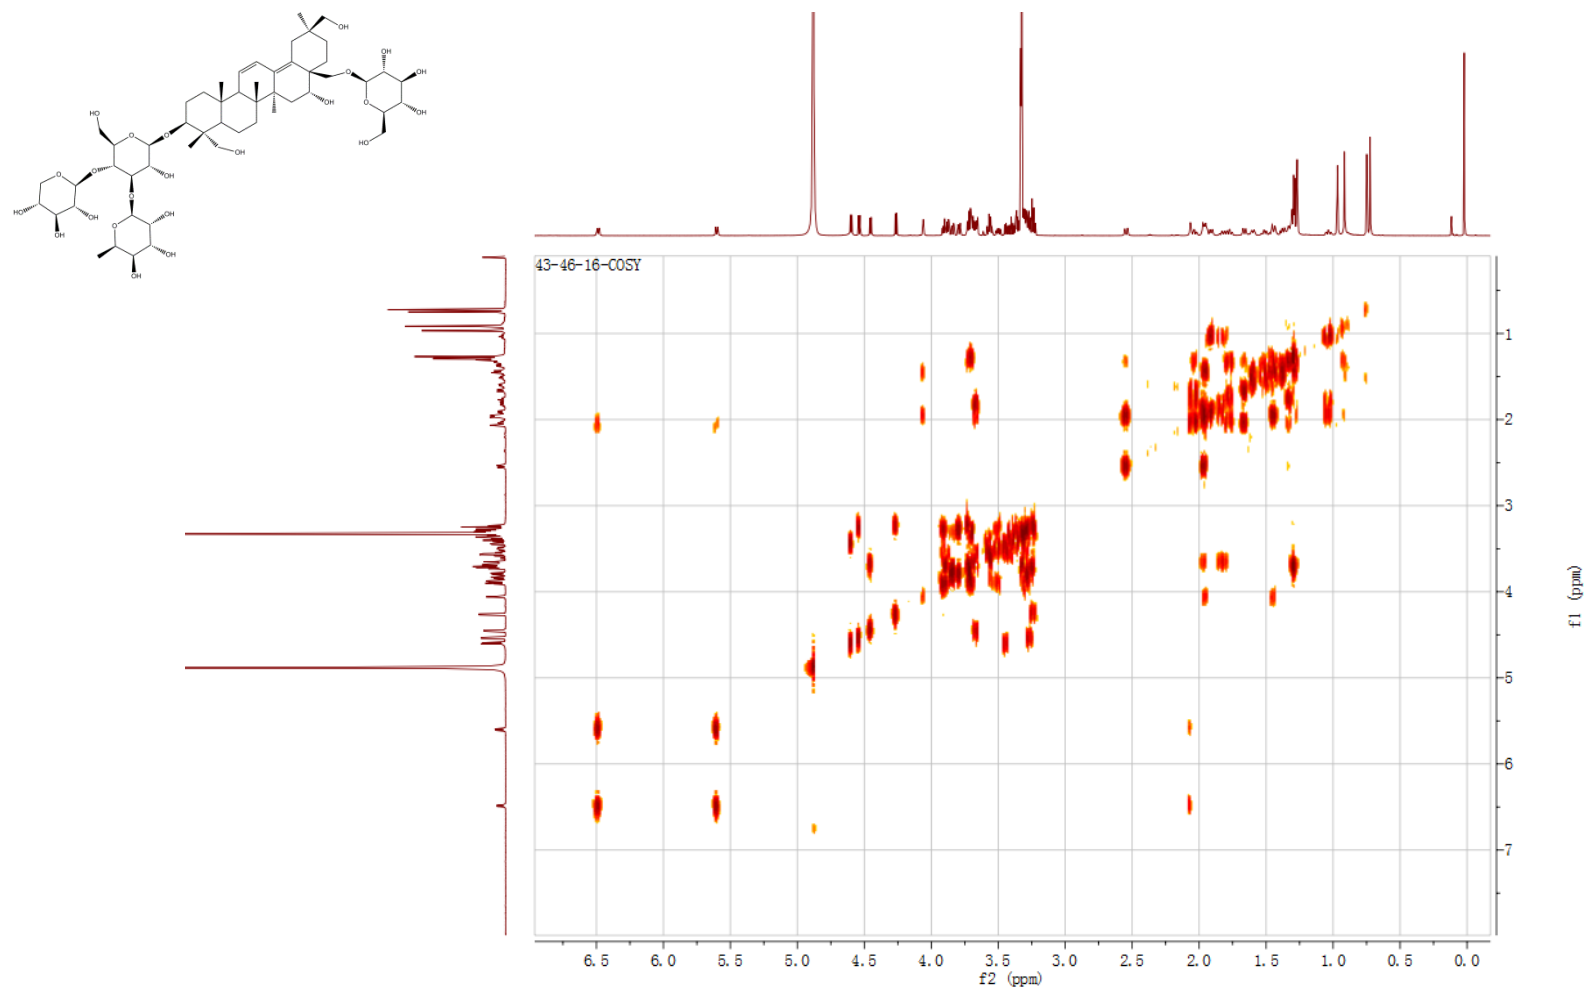

**Figure S16.** HR-ESI-MS of compound 2

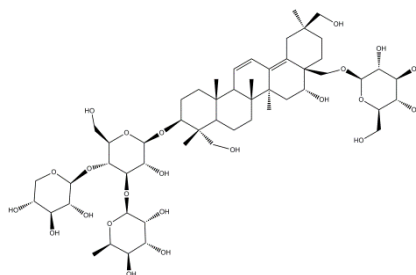

### Mass Spectrum SmartFormula Report

|                       |                                                            |                      |                                      |                  |               |
|-----------------------|------------------------------------------------------------|----------------------|--------------------------------------|------------------|---------------|
| Analysis Info         |                                                            |                      | Acquisition Date 2021-11-24 16:10:38 |                  |               |
| Analysis Name         | D:\Data\A501\WYL\2021\20211122\B502-43-46-16_GE3_01_3477.d |                      |                                      |                  |               |
| Method                | lc-ms_as_ms-0.5min-mid.m                                   |                      |                                      | Operator         | Demo User     |
| Sample Name           | B502-43-46-16                                              |                      |                                      | Instrument       | compact       |
| Comment               |                                                            |                      |                                      |                  | 8255754.20156 |
|                       |                                                            |                      |                                      |                  |               |
| Acquisition Parameter |                                                            |                      |                                      |                  |               |
| Source Type           | ESI                                                        | Ion Polarity         | Positive                             | Set Nebulizer    | 0.3 Bar       |
| Focus                 | Not active                                                 | Set Capillary        | 3500 V                               | Set Dry Heater   | 200 °C        |
| Scan Begin            | 50 m/z                                                     | Set End Plate Offset | -500 V                               | Set Dry Gas      | 3.0 l/min     |
| Scan End              | 3000 m/z                                                   | Set Charging Voltage | 2000 V                               | Set Divert Valve | Source        |
|                       |                                                            | Set Corona           | 0 nA                                 | Set APCI Heater  | 0 °C          |

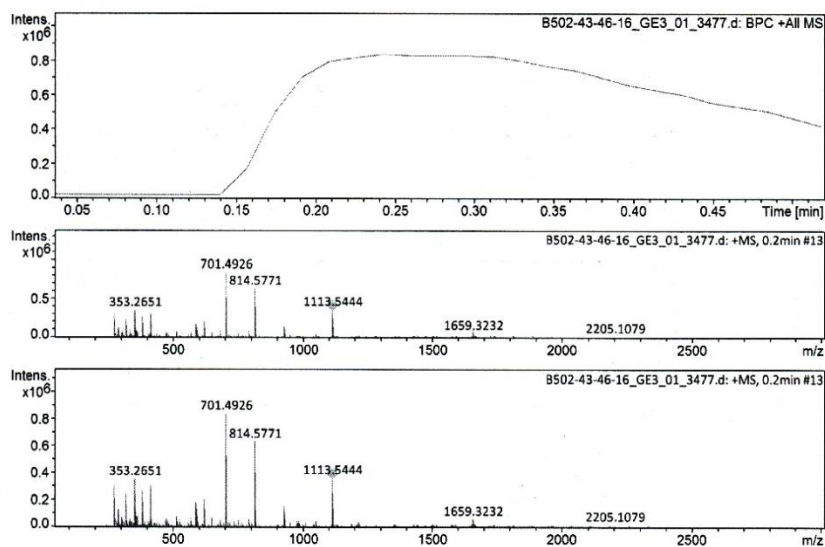

| Meas. m/z | # | Ion Formula                                       | m/z       | err [ppm] | mSigma | # mSigma | Score  | rdb  | e <sup>-</sup> Conf | N-Rule | Adduct |
|-----------|---|---------------------------------------------------|-----------|-----------|--------|----------|--------|------|---------------------|--------|--------|
| 1113.5444 | 1 | C <sub>53</sub> H <sub>86</sub> NaO <sub>23</sub> | 1113.5452 | 0.7       | 42.2   | 1        | 100.00 | 11.0 | even                | ok     | M+Na   |

**Figure S17.**  $^1\text{H}$  NMR (700 MHz, Methanol- $\text{D}_4$ ) spectrum of compound **3**

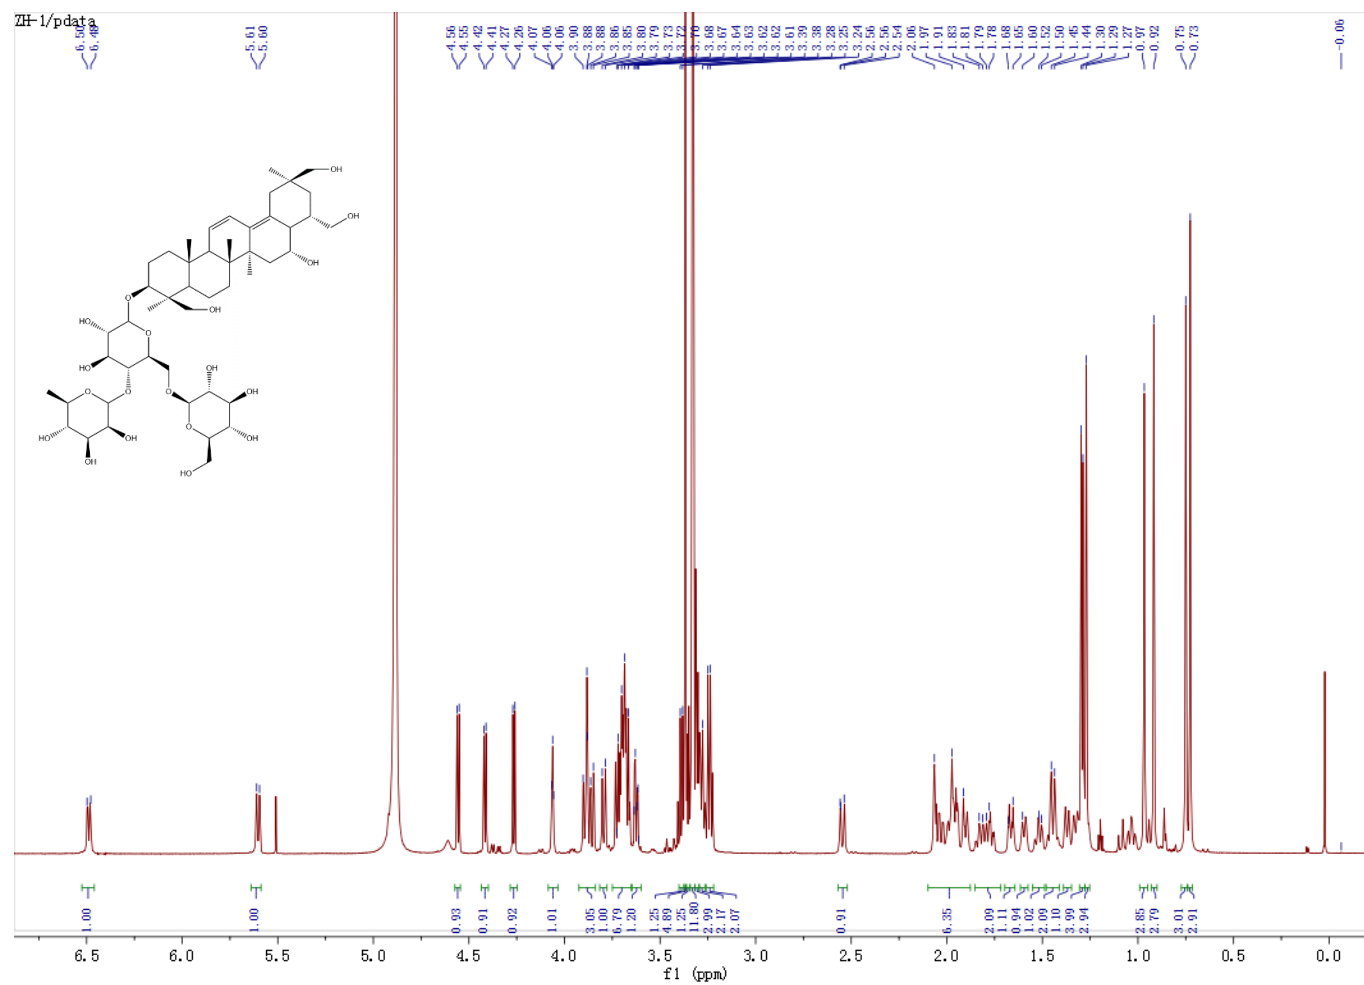

**Figure S18.**  $^{13}\text{C}$  NMR (176 MHz, Methanol- $\text{D}_4$ ) spectrum of compound 3

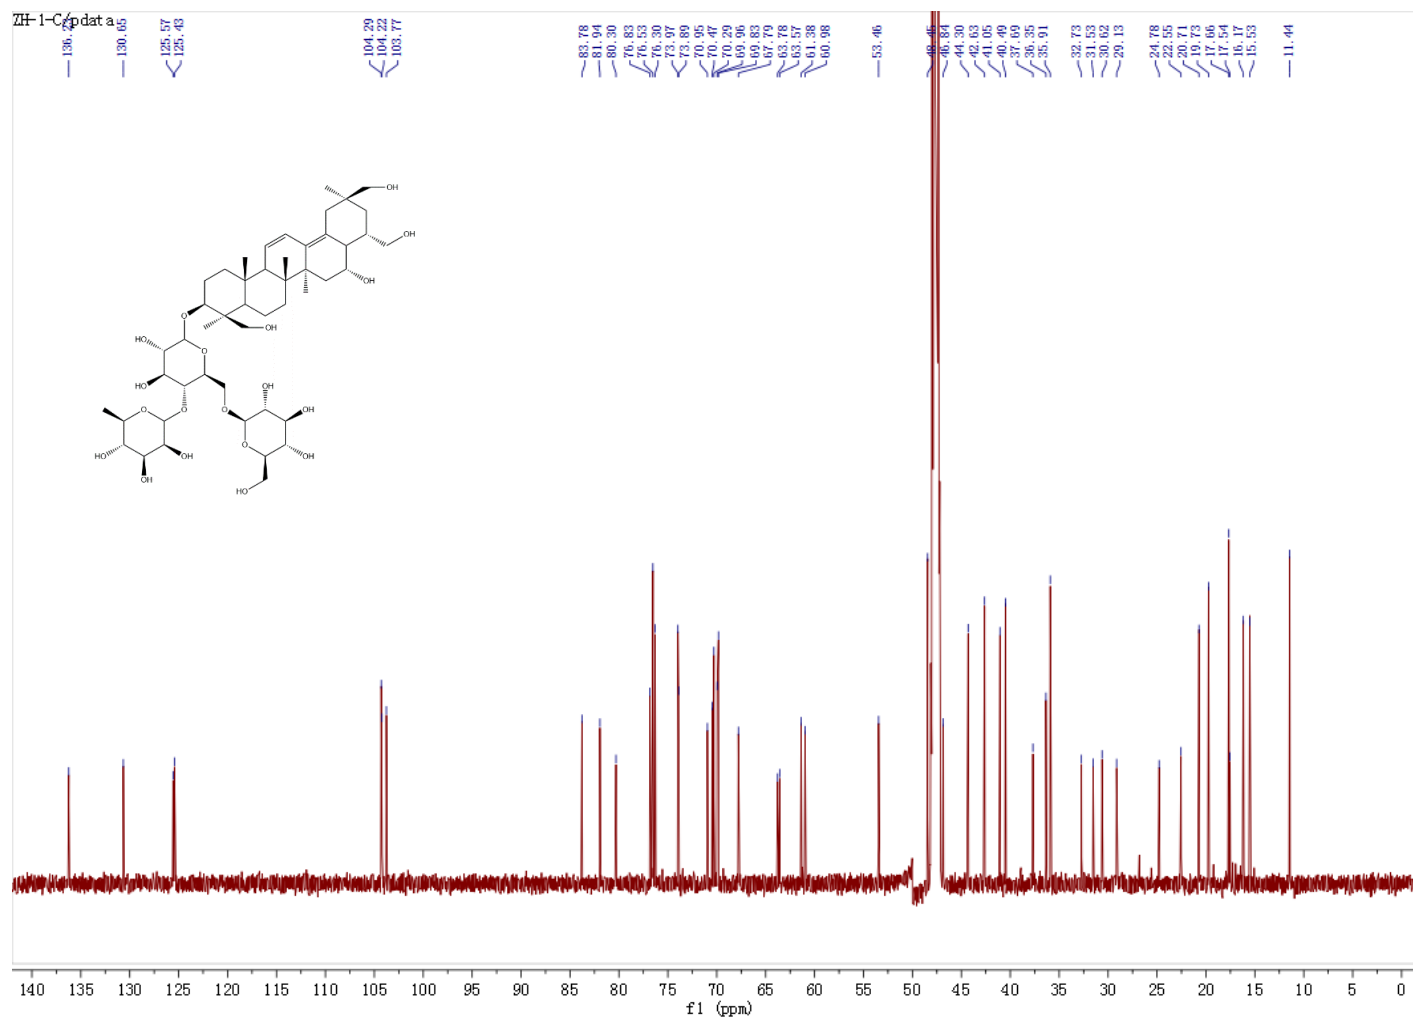

**Figure S19.** HR-ESI-MS of compound 3

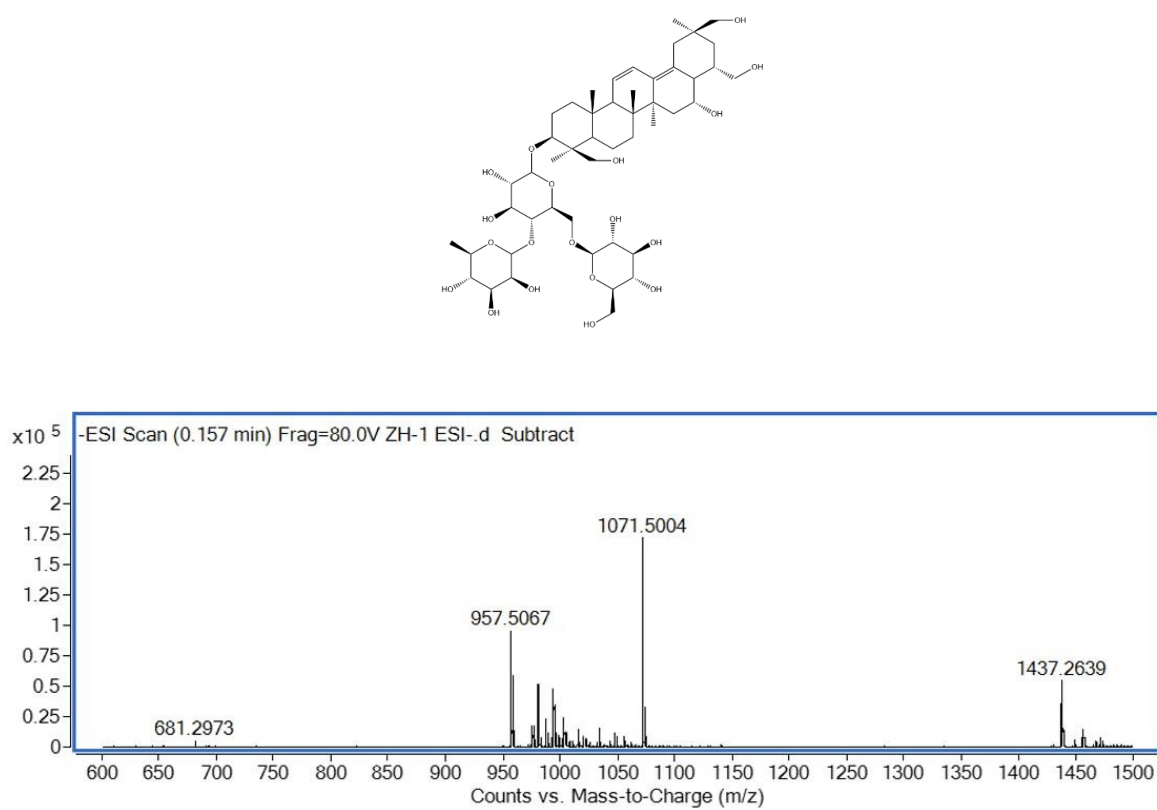

**Figure S20.**  $^1\text{H}$  NMR (700 MHz, Methanol- $\text{D}_4$ ) of compound 4

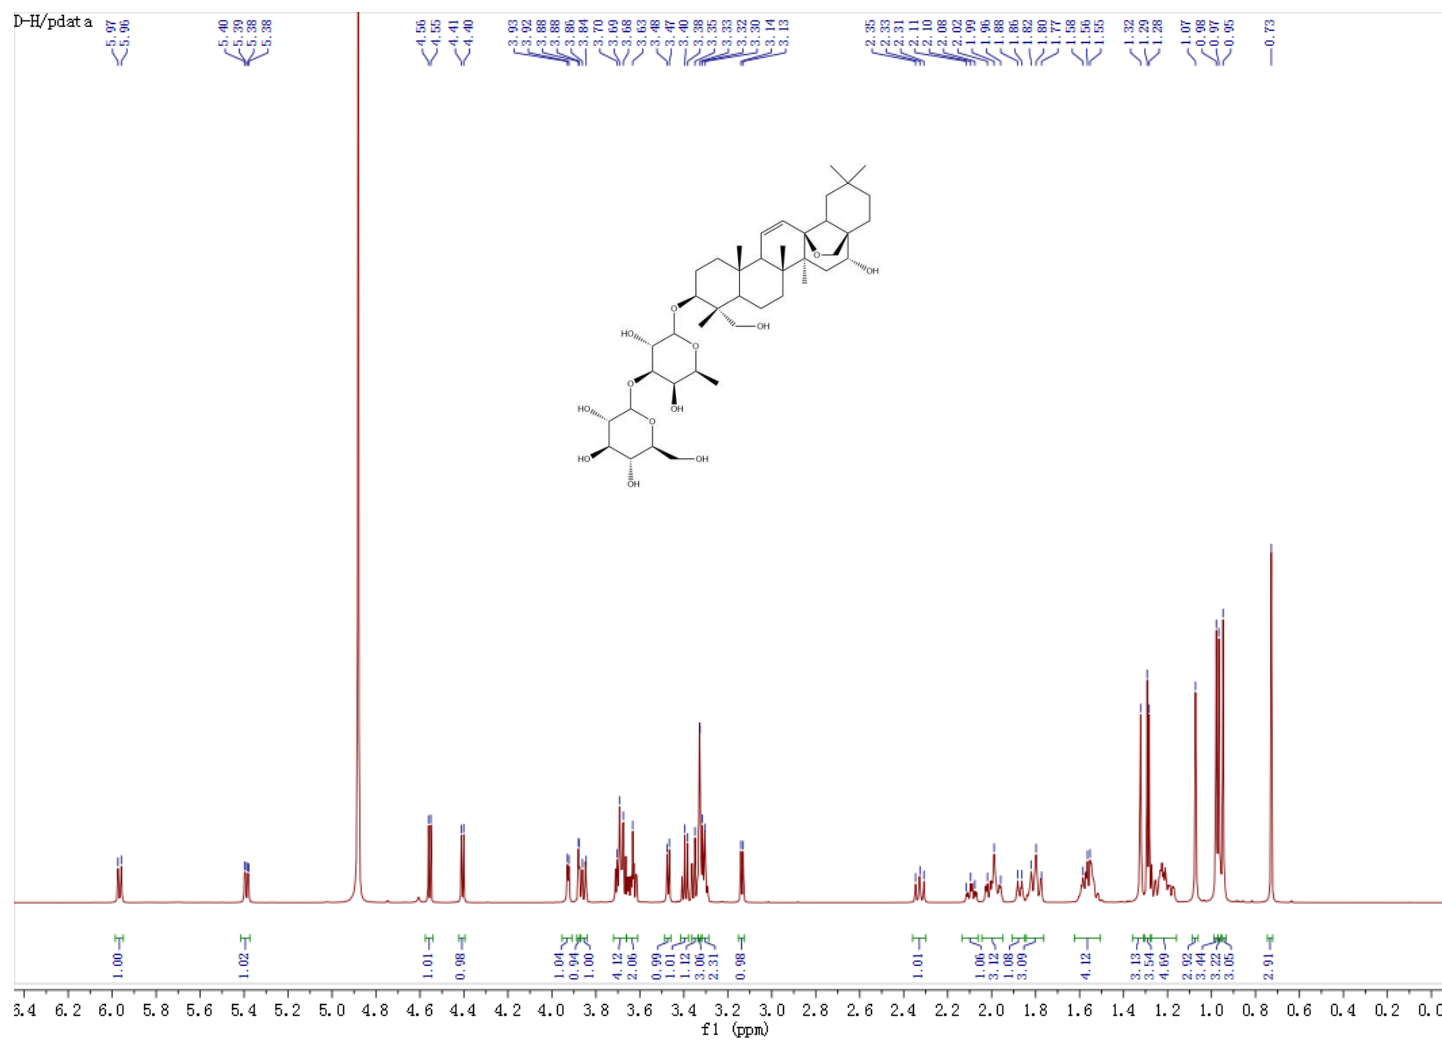



**Figure S21.**  $^{13}\text{C}$  NMR (176 MHz, Methanol- $\text{D}_4$ ) spectrum of compound 4

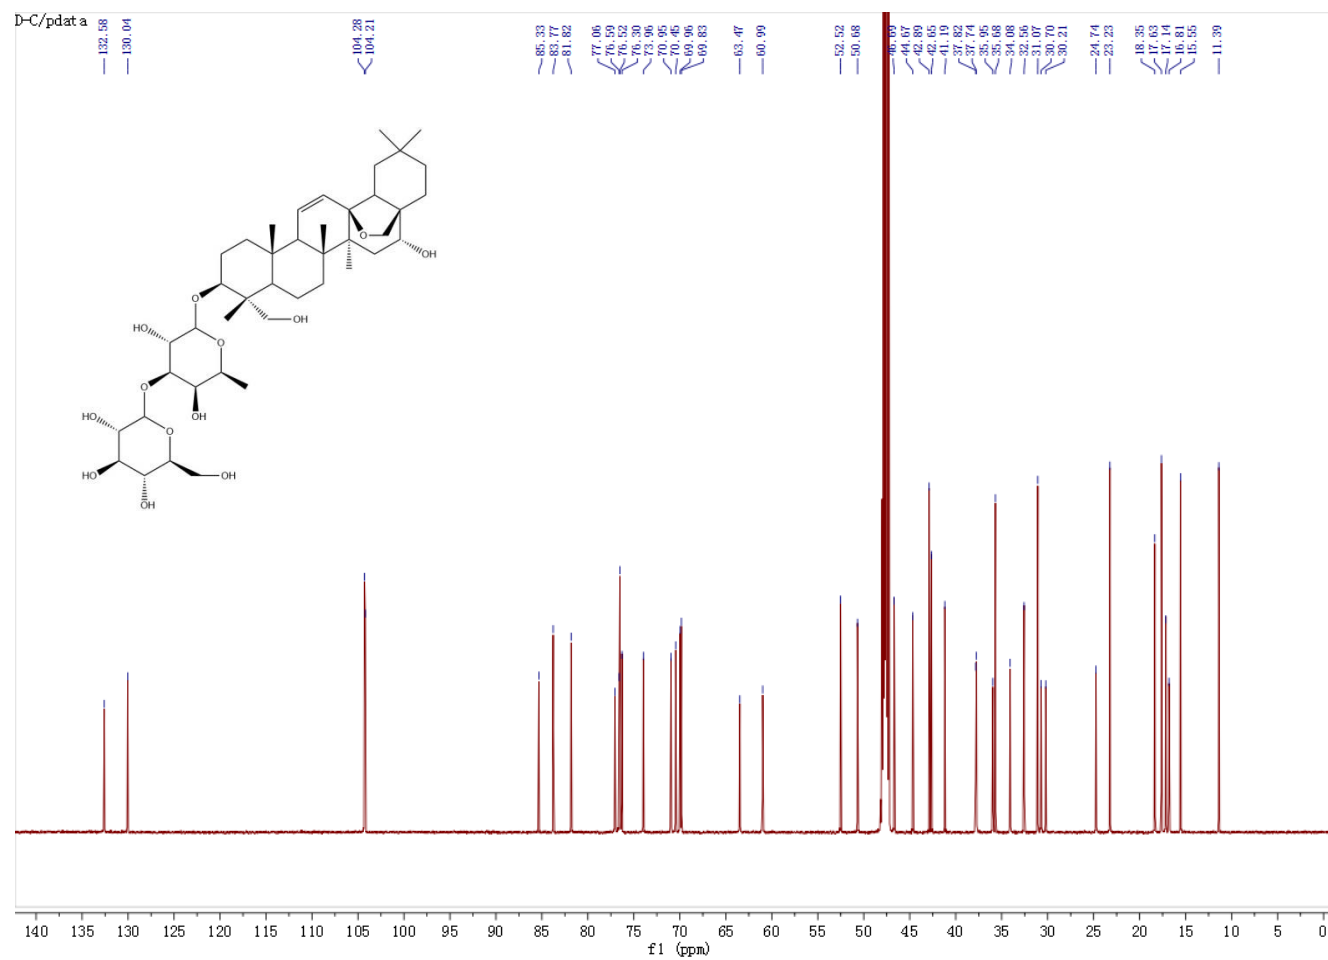

**Figure S22.** HR-ESI-MS of compound 4

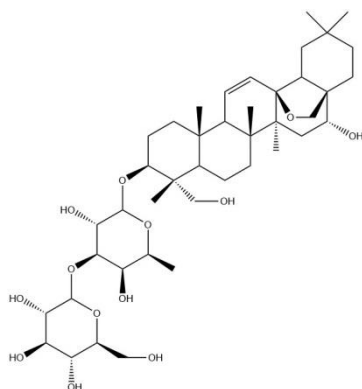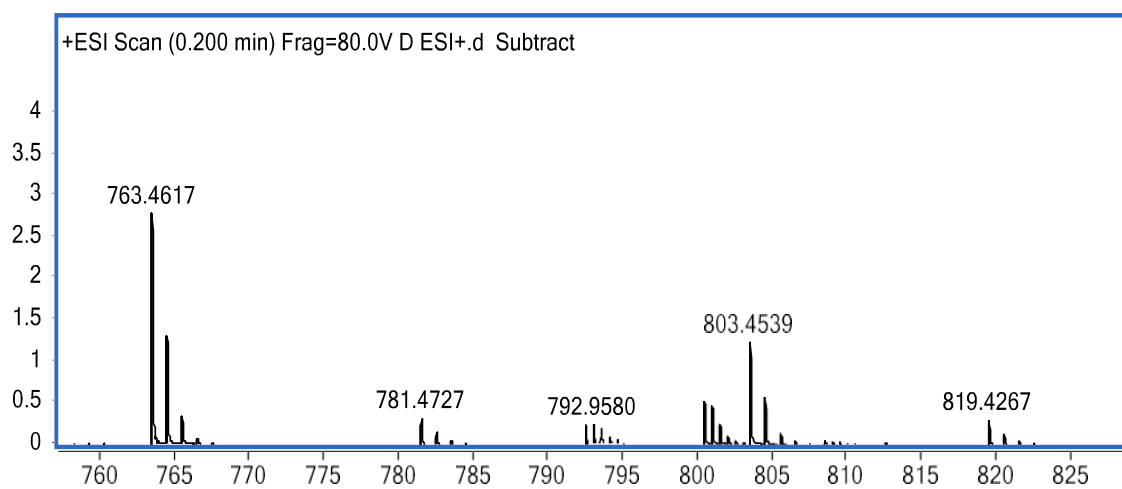

Supplement: Supplementary file 1 [file 35118688]
